# Supplementary material for: HIV-1 Myristoylated Nef Treatment of Murine Microglial Cells Activates Inducible Nitric Oxide Synthase, NO2 Production and Neurotoxic Activity
Source: PubMed Central journal article supplement (PMC4465743; doi:10.1371/journal.pone.0130189), 2015-06-11

**S1 File. Western Blot densitometric analysis of MDMs treated with Nef for 48 h.**

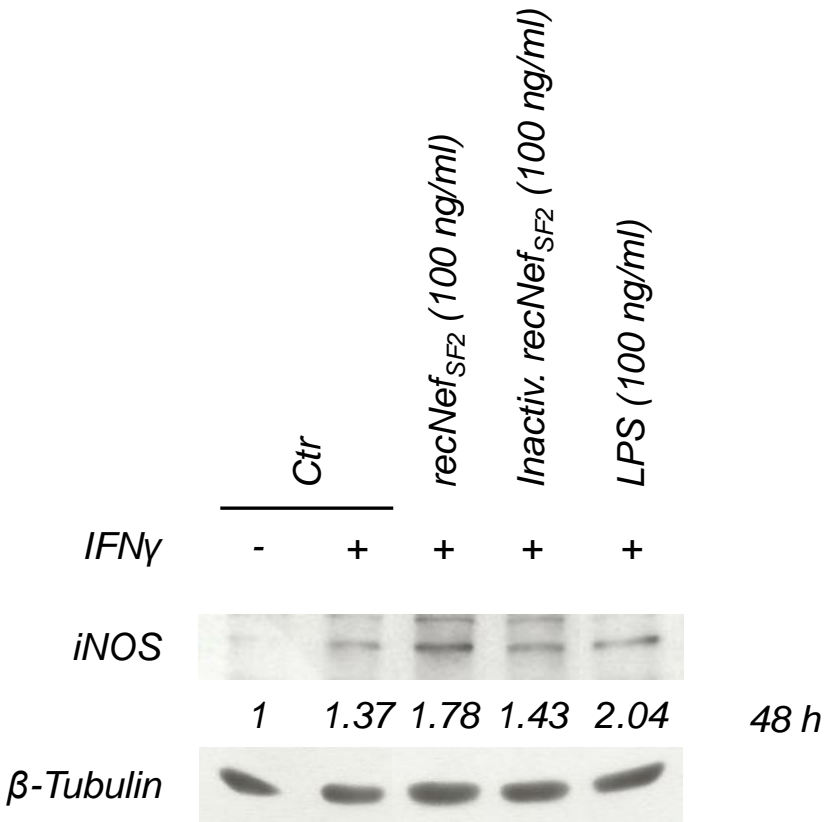

Supplement: pone.0130189.s001.pdf [file pone.0130189.s001.pdf]
